# Supplementary material for: Correlations of Rainfall and Forest Type with Papilionid Assemblages in Assam in Northeast India
Source: Hindawi journal article supplement (doi:10.1155/2010/560396), 2010-01-01
Supplement: f1 [file 560396.f1.pdf]

## Appendix 1

For multivariate analysis, the butterfly abundance data from 20 fixed transects of 5 study sites were pooled by season, year and forest type.

| Sites | Season | Year | Transect | Forest type |
|-------|--------|------|----------|-------------|
| 1     | Dry    | 1    | T1       | SCF         |
| 2     | Dry    | 1    | T2       | SCF         |
| 3     | Dry    | 1    | T3       | CF          |
| 4     | Dry    | 1    | T4       | CF          |
| 5     | Wet    | 1    | T1       | SCF         |
| 6     | Wet    | 1    | T2       | SCF         |
| 7     | Wet    | 1    | T3       | CF          |
| 8     | Wet    | 1    | T4       | CF          |
| 9     | Dry    | 2    | T1       | SCF         |
| 10    | Dry    | 2    | T2       | SCF         |
| 11    | Dry    | 2    | T3       | CF          |
| 12    | Dry    | 2    | T4       | CF          |
| 13    | Wet    | 2    | T1       | SCF         |
| 14    | Wet    | 2    | T2       | SCF         |
| 15    | Wet    | 2    | T3       | CF          |
| 16    | Wet    | 2    | T4       | CF          |

**Notes:** Categorical variables: 1) Forest type - Scattered/Open forest/Gap = SCF  
Closed forest = CF

2) Season – Dry and Wet seasons

## Appendix 2

2.1: Environmental variables for ordination of Papilionidae species assemblages showing their abundance and distribution in study sites (S1, S2 & S3) in Garbhanga range.

| Site | Latitude | Longitude | Average Total       |                  | Forest | Season | Year |
|------|----------|-----------|---------------------|------------------|--------|--------|------|
|      |          |           | Altitude<br>(m) MSL | Rainfall<br>(mm) |        |        |      |
| 1    | 26.05261 | 91.46426  | 102                 | 0                | SC     | Dry    | 1    |
| 2    | 26.05116 | 91.46289  | 88                  | 16               | SC     | Dry    | 1    |
| 3    | 26.04507 | 91.46087  | 170                 | 61               | CL     | Dry    | 1    |
| 4    | 26.04384 | 91.46011  | 183                 | 83               | CL     | Dry    | 1    |
| 5    | 26.05261 | 91.46426  | 102                 | 344              | SC     | Wet    | 1    |
| 6    | 26.05116 | 91.46289  | 88                  | 379              | SC     | Wet    | 1    |
| 7    | 26.04507 | 91.46087  | 170                 | 243              | CL     | Wet    | 1    |
| 8    | 26.04384 | 91.46011  | 183                 | 25               | CL     | Wet    | 1    |
| 9    | 26.05261 | 91.46426  | 102                 | 0                | SC     | Dry    | 2    |
| 10   | 26.05116 | 91.46289  | 88                  | 19               | SC     | Dry    | 2    |
| 11   | 26.04507 | 91.46087  | 170                 | 30               | CL     | Dry    | 2    |
| 12   | 26.04384 | 91.46011  | 183                 | 121              | CL     | Dry    | 2    |
| 13   | 26.05261 | 91.46426  | 102                 | 200              | SC     | Wet    | 2    |
| 14   | 26.05116 | 91.46289  | 88                  | 316              | SC     | Wet    | 2    |
| 15   | 26.04507 | 91.46087  | 170                 | 28               | CL     | Wet    | 2    |
| 16   | 26.04384 | 91.46011  | 183                 | 149              | CL     | Wet    | 2    |

---

**2.2: Environmental variables for ordination of Papilionidae species assemblages showing their abundance and distribution in study sites (S4 & S5) in Rani range.**

| Site | Latitude | Longitude | Average             | Total            | Forest | Season | Year |
|------|----------|-----------|---------------------|------------------|--------|--------|------|
|      |          |           | Altitude<br>(m) MSL | Rainfall<br>(mm) |        |        |      |
| 1    | 26.01433 | 91.3551   | 70                  | 0                | SC     | Dry    | 1    |
| 2    | 26.01425 | 91.35513  | 70                  | 16               | SC     | Dry    | 1    |
| 3    | 26.04506 | 91.36109  | 70                  | 61               | CL     | Dry    | 1    |
| 4    | 26.01519 | 91.35363  | 68                  | 83               | CL     | Dry    | 1    |
| 5    | 26.01433 | 91.3551   | 70                  | 344              | SC     | Wet    | 1    |
| 6    | 26.01425 | 91.35513  | 70                  | 379              | SC     | Wet    | 1    |
| 7    | 26.04506 | 91.36109  | 70                  | 243              | CL     | Wet    | 1    |
| 8    | 26.01519 | 91.35363  | 68                  | 25               | CL     | Wet    | 1    |
| 9    | 26.01433 | 91.3551   | 70                  | 0                | SC     | Dry    | 2    |
| 10   | 26.01425 | 91.35513  | 70                  | 19               | SC     | Dry    | 2    |
| 11   | 26.04506 | 91.36109  | 70                  | 30               | CL     | Dry    | 2    |
| 12   | 26.01519 | 91.35363  | 68                  | 121              | CL     | Dry    | 2    |
| 13   | 26.01433 | 91.3551   | 70                  | 200              | SC     | Wet    | 2    |
| 14   | 26.01425 | 91.35513  | 70                  | 316              | SC     | Wet    | 2    |
| 15   | 26.04506 | 91.36109  | 70                  | 28               | CL     | Wet    | 2    |
| 16   | 26.01519 | 91.35363  | 68                  | 149              | CL     | Wet    | 2    |

**Notes:**

Independent variables: Year (Year 1 – 2003 and Year 2 – 2004)

Rain (Total rainfall of the sampling months)

Altitude

Geographical position (Latitude and Longitude)

Appendix 3

Permutation tests for CCA under direct model :

3.1 : Garbhanga range (pooled abundance data of 3 study sites)

Model: cca (formula = km2 ~ lat + long + alt + forest + season + year + class + rain + relative humidity + temp<sup>r</sup>. data = km2env)

|          | Df | Chisq  | F      | N.Perm | Pr(>F)  |     |
|----------|----|--------|--------|--------|---------|-----|
| Model    | 6  | 0.6165 | 9.6932 | 200    | < 0.005 | *** |
| Residual | 9  | 0.0954 |        |        |         |     |

Significance codes: 0 '\*\*\*\*' 0.001 '\*\*\*' 0.01 '\*\*' 0.05 '.' 0.1 ' ' 1

3.2 : Rani range (pooled abundance data of 2 study sites)

Model: cca (formula = km8 ~ lat + long + alt + forest. + season. + year + class + rain + relative humidity + temp<sup>r</sup>. data = km8env)

|          | Df | Chisq  | F      | N.Perm | Pr(>F)  |     |
|----------|----|--------|--------|--------|---------|-----|
| Model    | 6  | 0.3298 | 5.4097 | 200    | < 0.005 | *** |
| Residual | 9  | 0.0914 |        |        |         |     |

Significance codes: 0 '\*\*\*\*' 0.001 '\*\*\*' 0.01 '\*\*' 0.05 '.' 0.1 ' ' 1

## Appendix 4

Systematic list of Papilionidae of Rani-Garbhanga Reserve Forest, Assam, Northeast India, identified during the two-year survey (2001-2002). The geographic range classification follows Spitzer et al. 1993.

| Genera              | Scientific name                                 | Wing span (mm) | Status      | Geographic range score | Habitat association by forest type based on CCA results |
|---------------------|-------------------------------------------------|----------------|-------------|------------------------|---------------------------------------------------------|
| <i>Atrophaneura</i> | <i>Atrophaneura dasarada</i> Moore, 1857        | 100-140        | NR / NT     | 1                      | Closed forest                                           |
|                     | <i>Atrophaneura polyeuctes</i> Doubleday, 1842  | 100-130        | NR          | 3                      | Closed forest                                           |
|                     | <i>Atrophaneura varuna</i> Westwood, 1842       | 88-136         | NR          | 2                      | Closed forest                                           |
|                     | <i>Atrophaneura aidoneus</i> Doubleday, 1845    | 100-120        | NC / NT     | 3                      | Closed forest                                           |
|                     | <i>Atrophaneura sycorax</i> Grose-Smith, 1885   | 110-130        |             | 3                      | Closed forest                                           |
| <i>Troides</i>      | <i>Troides aeacus</i> C & R Felder, 1860        | 120-190        | V/NT        | 2                      | Closed forest                                           |
|                     | <i>Troides helena</i> C & R Felder, 1865        | 140-190        | V           | 3                      | Closed forest                                           |
| <i>Pachliopta</i>   | <i>Pachliopta aristolochiae</i> Fabricius, 1775 | 80-110         | VC/ NT      | 3                      | Scattered/open forest                                   |
|                     | <i>Pachliopta hector</i> Linnaeus, 1758         | 90-100         | NT          | 3                      | Closed forest                                           |
| <i>Papilio</i>      |                                                 |                | (Protected) |                        |                                                         |
|                     | <i>Papilio polytes</i> Cramer 1775              | 80-100         | VC/NT       | 3                      | Intermediate                                            |
|                     | <i>Papilio memnon</i> Linnaeus, 1758            | 120-150        | C / NT      | 3                      | Closed forest                                           |
|                     | <i>Papilio castor</i> Wd., 1909                 | 100-130        | C / NT      | 1                      | Closed forest                                           |
|                     | <i>Papilio helenus</i> Linnaeus, 1758           | 100-120        | C/ NT       | 4                      | Closed forest                                           |
|                     | <i>Papilio nephelus</i> Westwood, 1845          | 115-130        | C/ NT       | 2                      | Closed forest                                           |
|                     | <i>Papilio polyctor</i> Moore, 1758             | 120-150        | C/ NT       | 3                      | Closed forest                                           |
|                     | <i>Papilio paris</i> Linnaeus, 1758             | 90-120         | C           | 3                      | Closed forest                                           |
|                     | <i>Papilio krishna</i> Moore, 1857              | 120-130        | UC          | 2                      | Closed forest                                           |
| <i>Chilasa</i>      | <i>Papilio demoleus</i> Linnaeus, 1758          | 80-100         | VC          | 4                      | Scattered/ open forest                                  |
|                     | <i>Chilasa clytia</i> Linnaeus, 1758            |                | C/ NT       | 3                      | Closed forest                                           |
| <i>Pathysa</i>      |                                                 |                | (Protected) |                        |                                                         |
|                     | <i>Pathysa aristeus</i> Doubleday, 1846         | 85-90          | Protected   | 1                      | Scattered/open forest                                   |
|                     | <i>Pathysa antipathies</i> Fabricius, 1787      | 80-95          |             | 3                      | Scattered/Open forest                                   |
|                     | <i>Pathysa xenocles</i> De Niceville, 1897      | 85-120         | C/ NT       | 1                      | Scattered/Open forest                                   |
| <i>Graphium</i>     | <i>Pathysa macareus</i> Fruhstorfer, 1902       | 80-100         | C/ NT       | 4                      | Scattered/Open forest                                   |
|                     | <i>Graphium doson</i> C&R Felder, 1864          | 70-80          | S           | 4                      | Scattered/Open forest                                   |
|                     | <i>Graphium agammemnon</i> Linnaeus, 1758       | 85-100         | C/NT & S    | 4                      | Scattered/Open forest                                   |
| <i>Lamproptera</i>  | <i>Graphium sarpedon</i> Linnaeus, 1758         | 80-90          | S           | 4                      | Scattered/Open forest                                   |
|                     | <i>Lamproptera meges</i> Tytler                 | 40-50          | NT /V       | 3                      | Intermediate                                            |
|                     | <i>Lamproptera curius</i> Fabricius, 1787       | 40-50          | NT/V        | 3                      | Intermediate                                            |

**Notes:** NR = Not Rare, NT = Not Threatened, NC = Not Common, C = Common, S = Secure, VC= Very Common,

UC = Uncommon, V = Vulnerable (IUCN, 2006)

Geographic range classification (Spitzer et al. 1993):

1 = Eastern Himalayas, Yunnan and Northern Indo-China, 2 = North India and all Indo-China,

3 = Oriental (Indo-Malayan region), 4 = Indo-Australian region (Australasian tropics), 5 = Palaeotropics,

6 = Larger than Palaeotropics – Cosmopolitan
